# Supplementary material
Source: PubMed Central journal article supplement (PMC10697236)

# Supplementary Figure 1: Smart-seq2 and 10X snRNA-seq gene fusion calling in human post-mortem brain samples

**A**

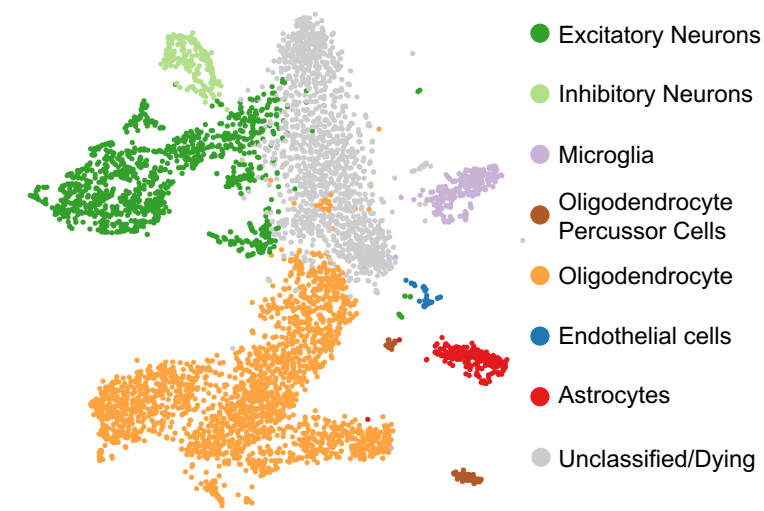

**B**

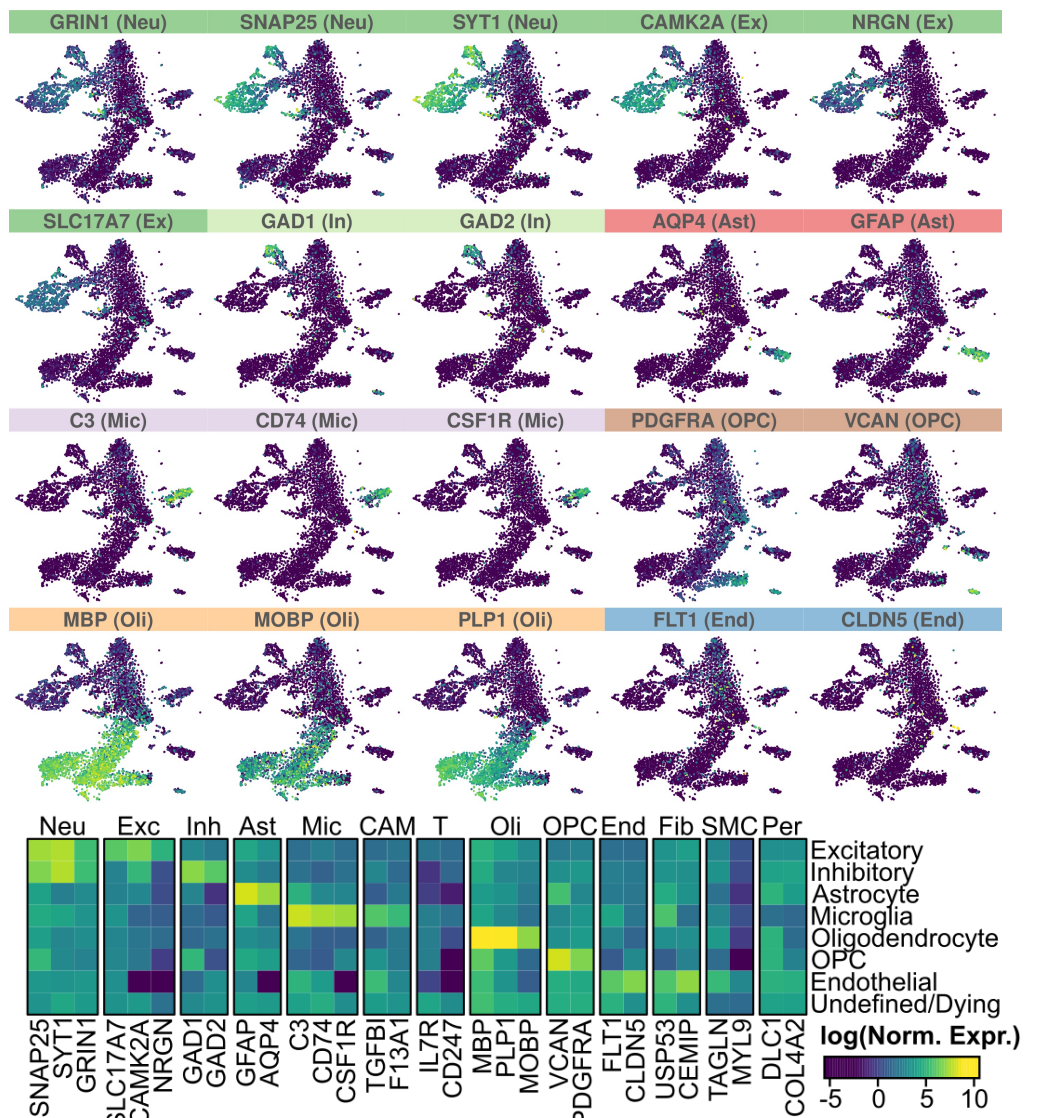

**C**

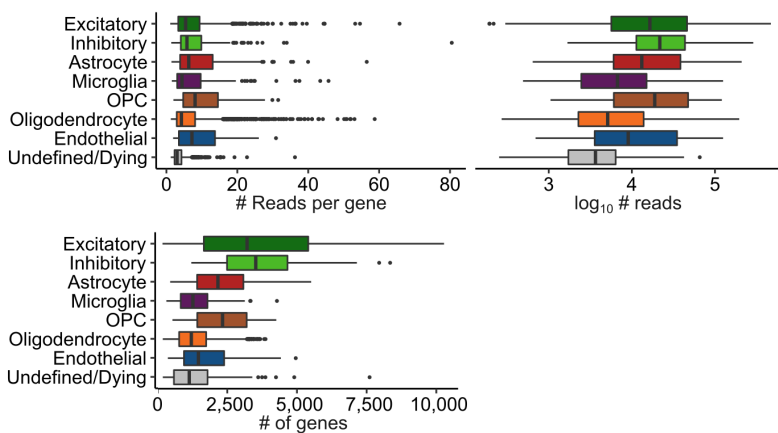

**D**

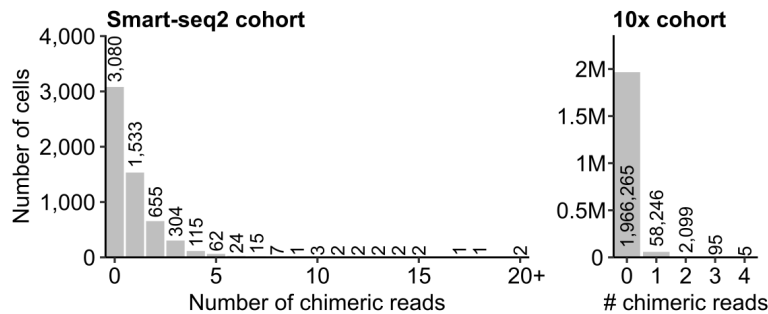

**E**

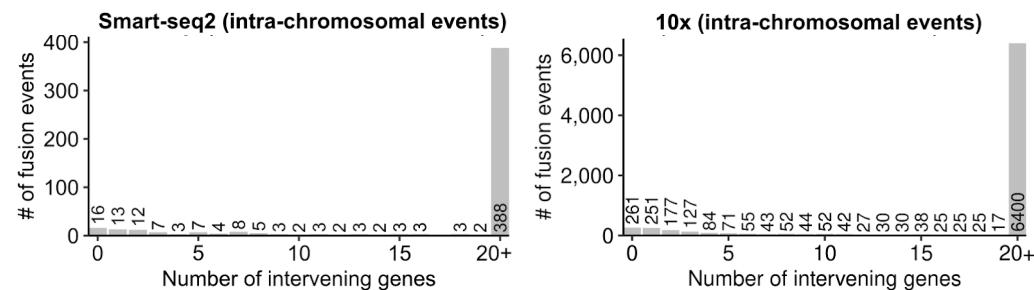

**F**

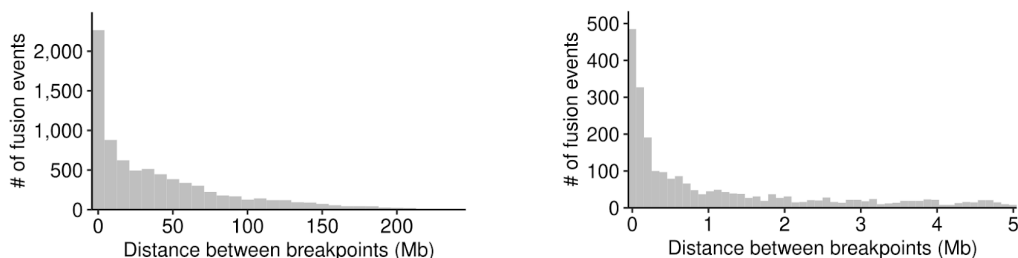

**H**

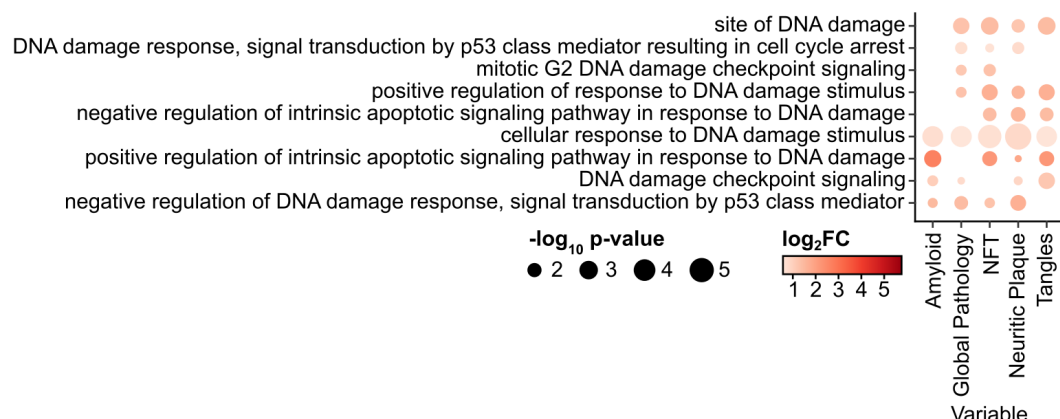

**G**

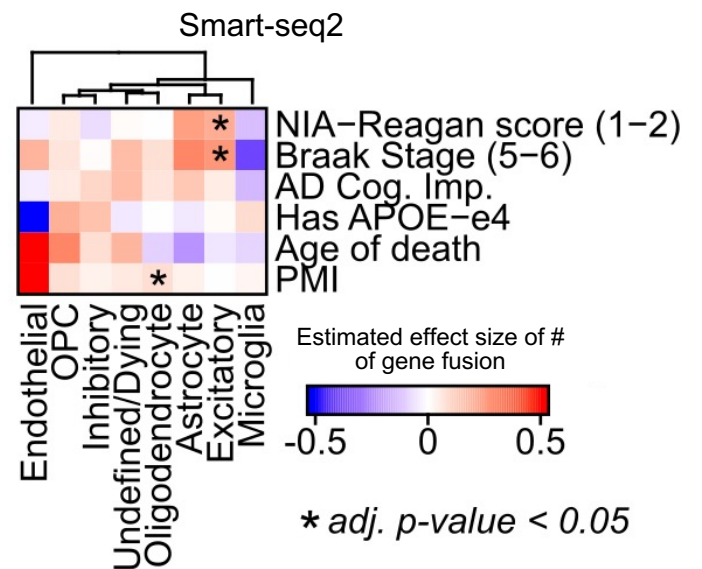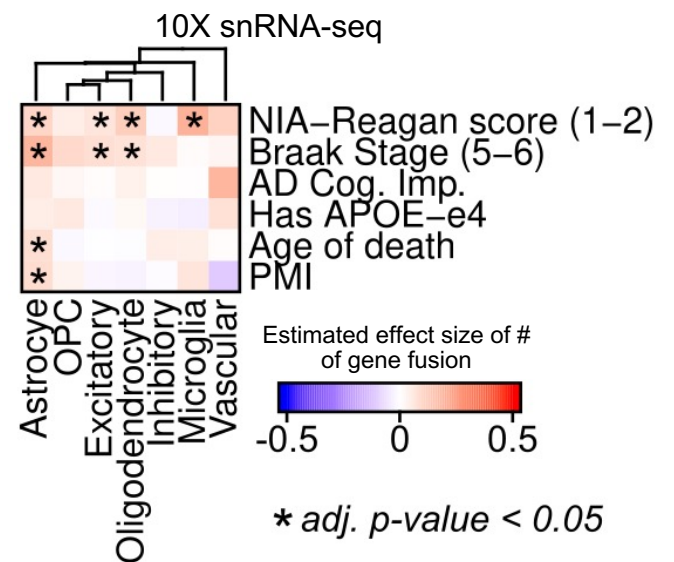

Supplement: NIHMS1939522-supplement-FigS1.pdf [file NIHMS1939522-supplement-FigS1.pdf]
