# Supplementary material
Source: PubMed Central journal article supplement (PMC10697236)

Supplementary Figure 2: Step 2 neurons with senescence signature have increased gene fusions and genome structural variations.

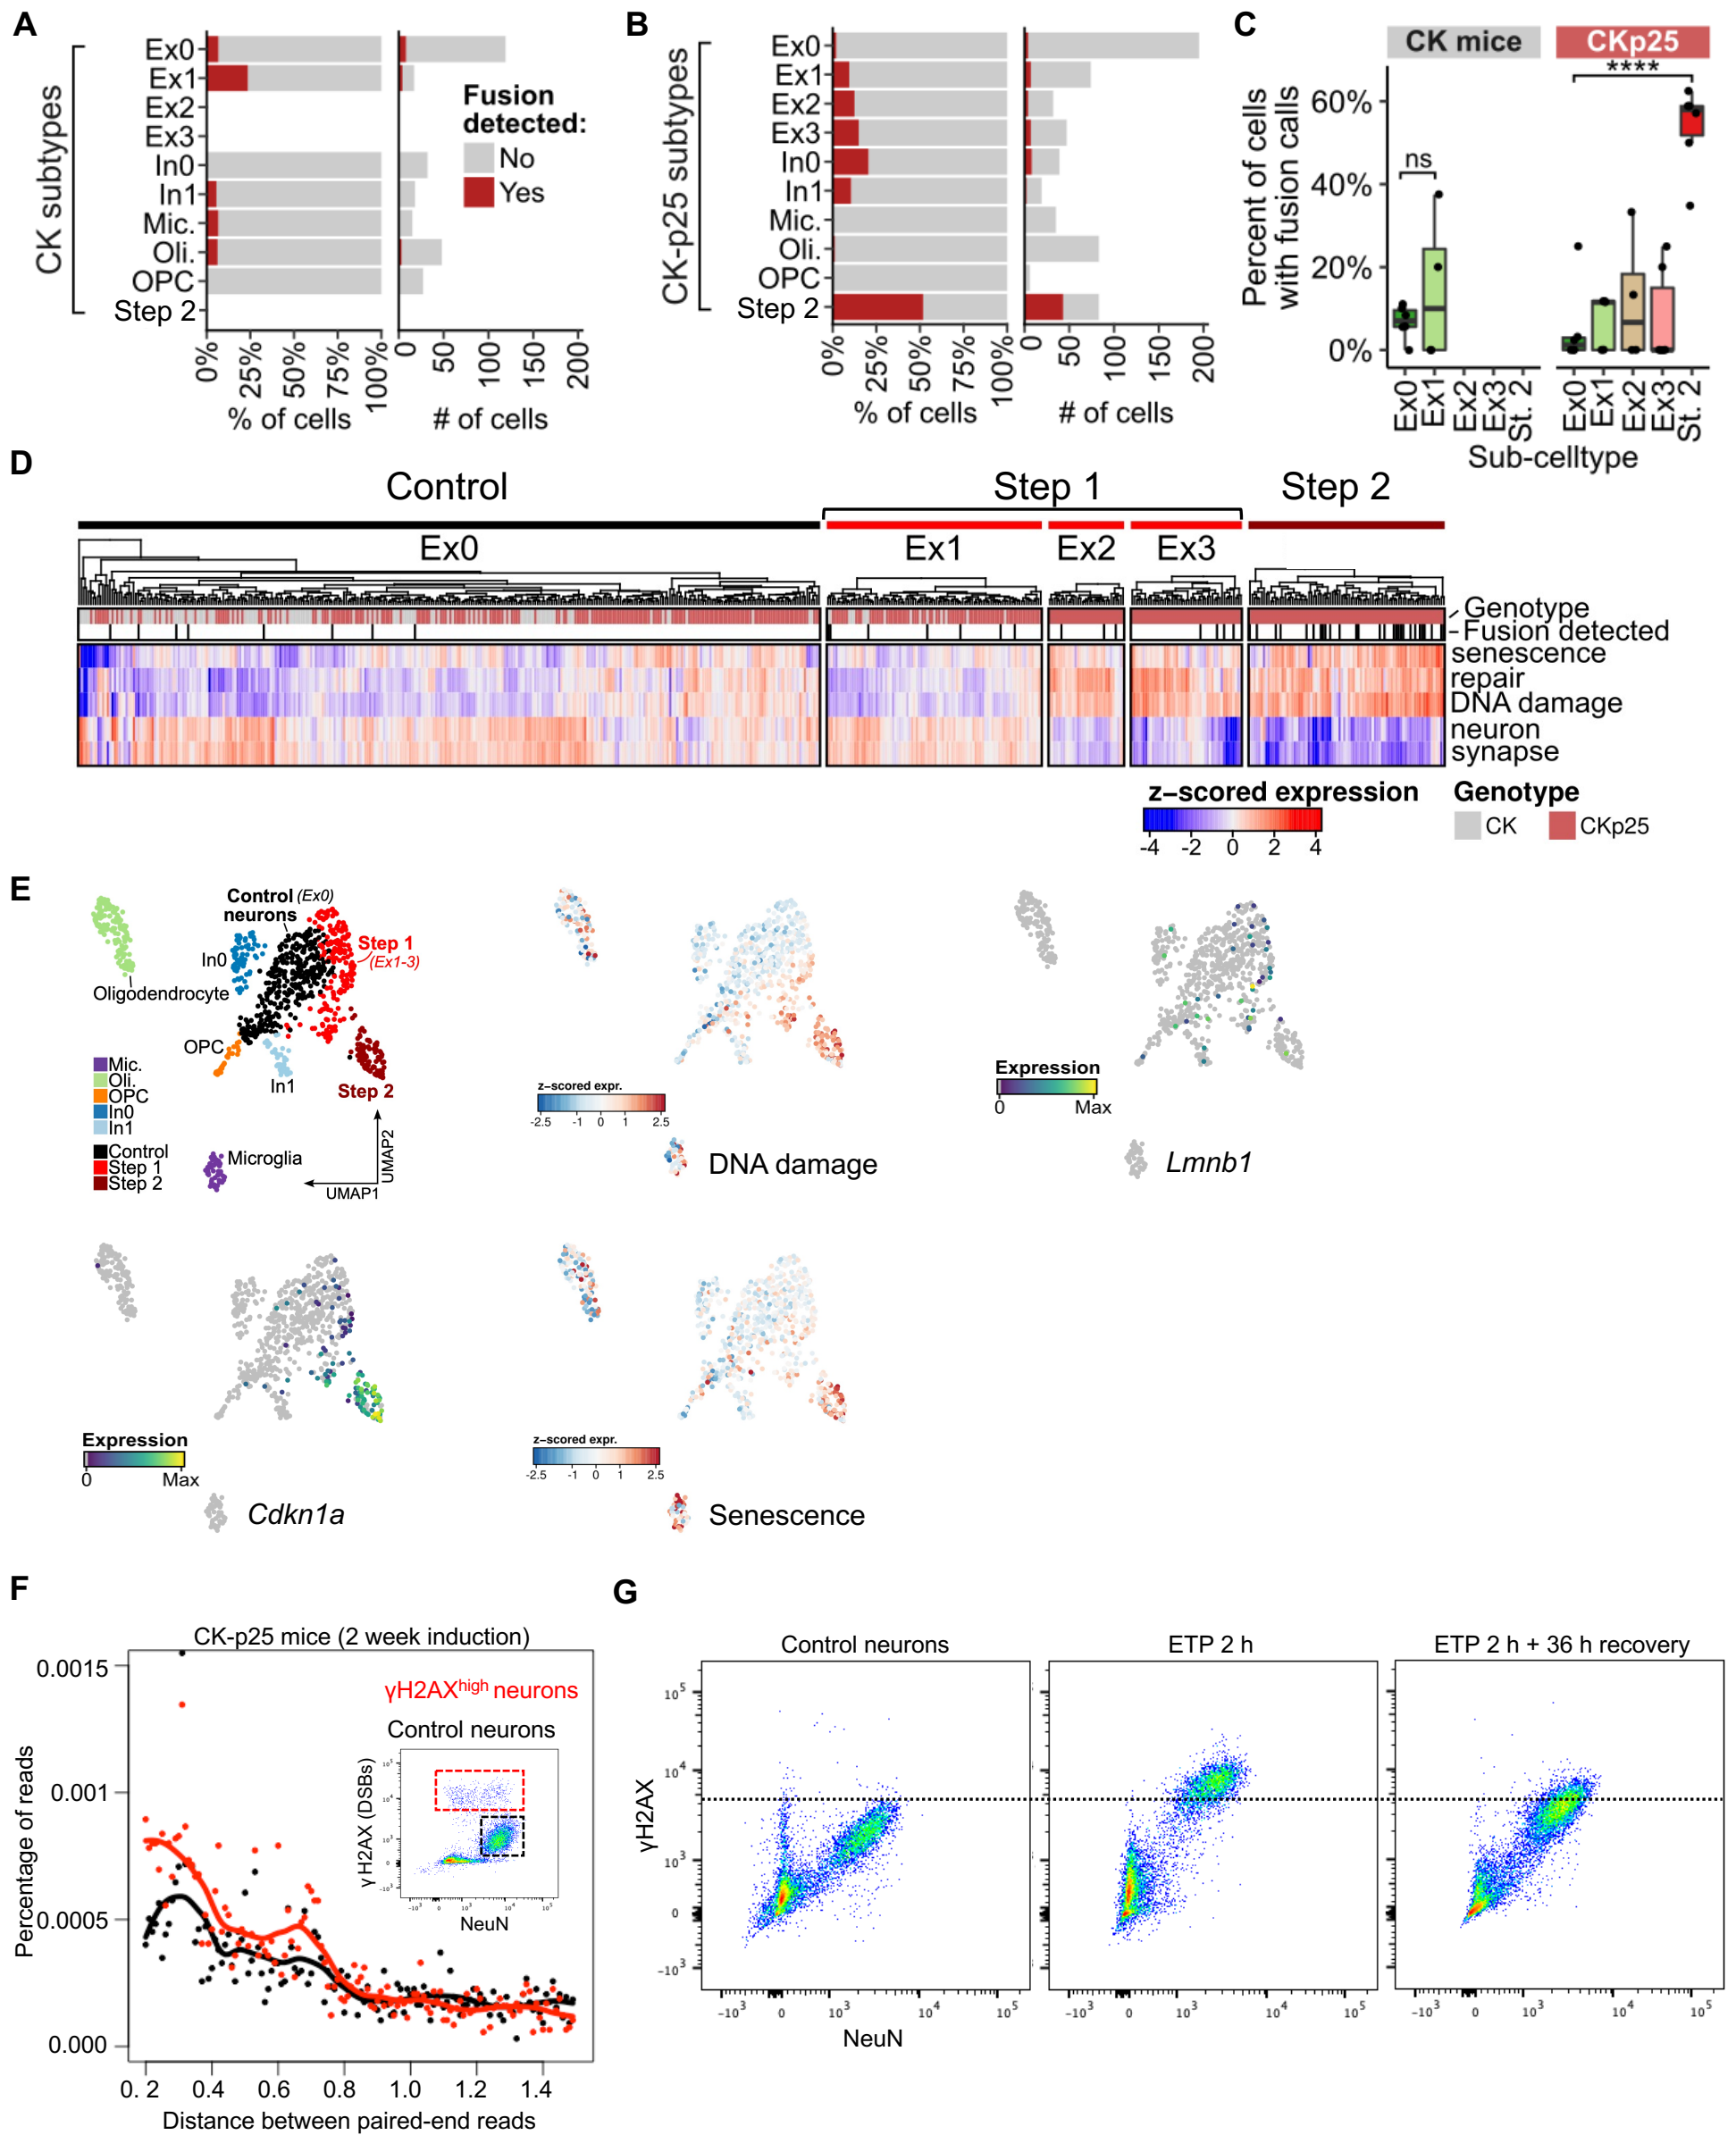

Supplement: NIHMS1939522-supplement-FigS2.pdf [file NIHMS1939522-supplement-FigS2.pdf]
