# Supplementary material
Source: PubMed Central journal article supplement (PMC10697236)

Supplementary Figure 4: 3D genome organization is disrupted in neurons harboring DSBs

**A**

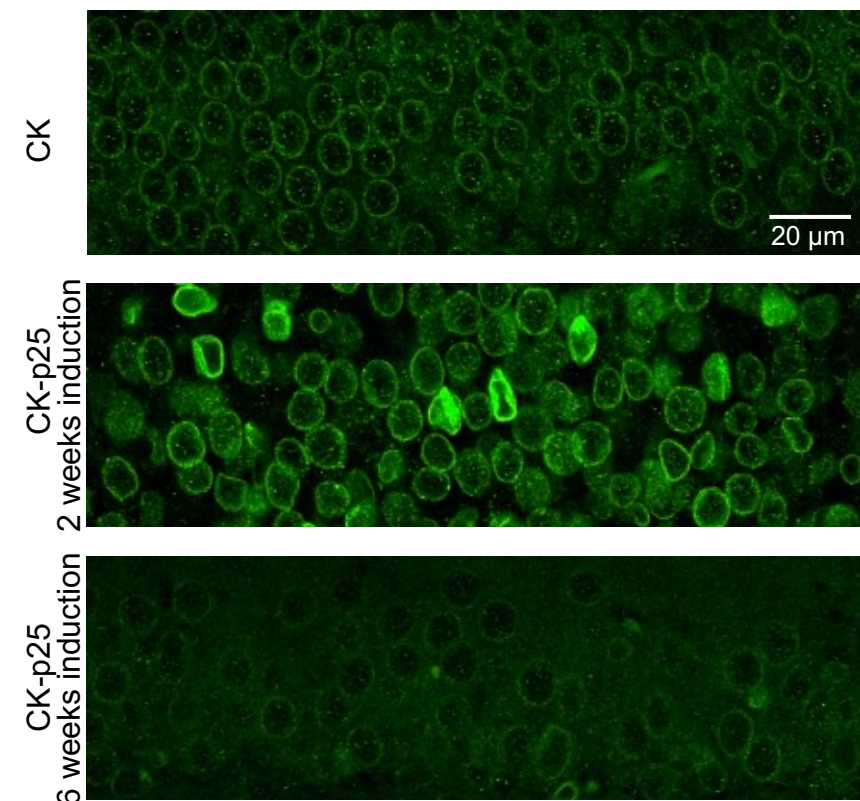

**B**

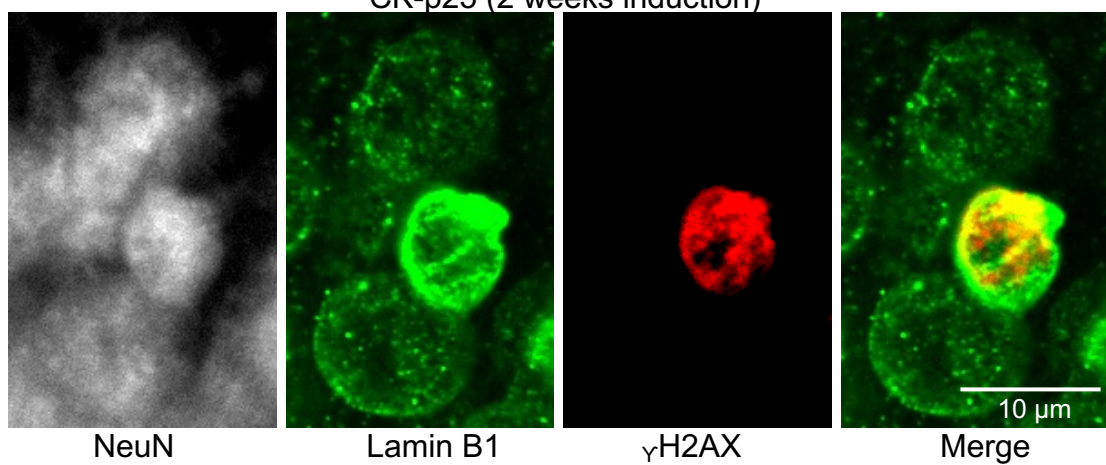

**C**

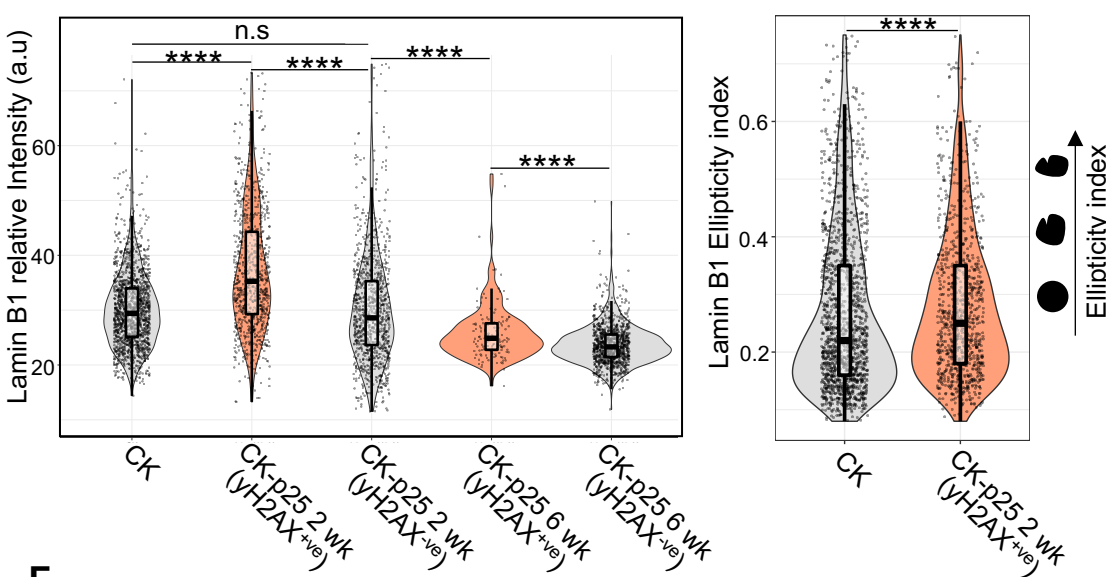

**E**

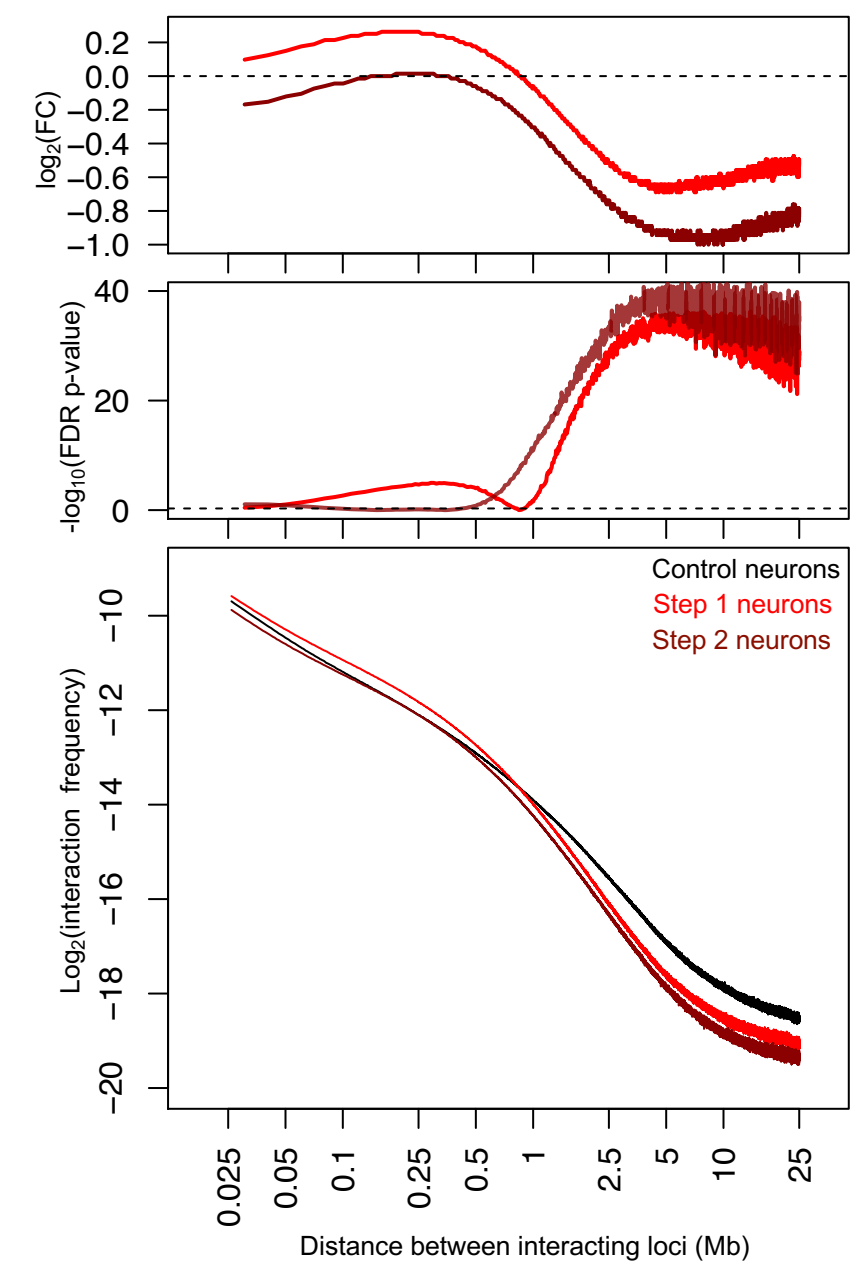

**F**

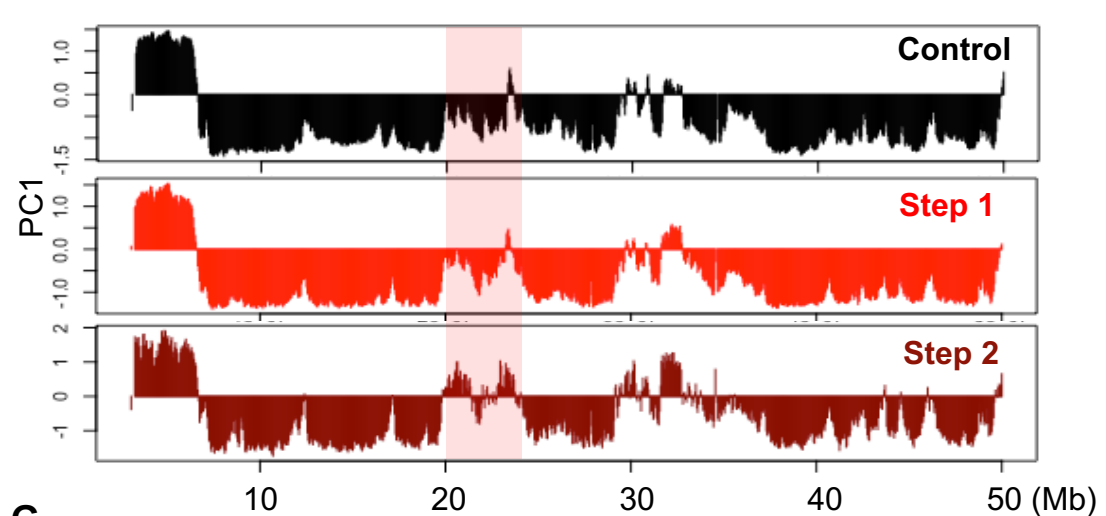

**G**

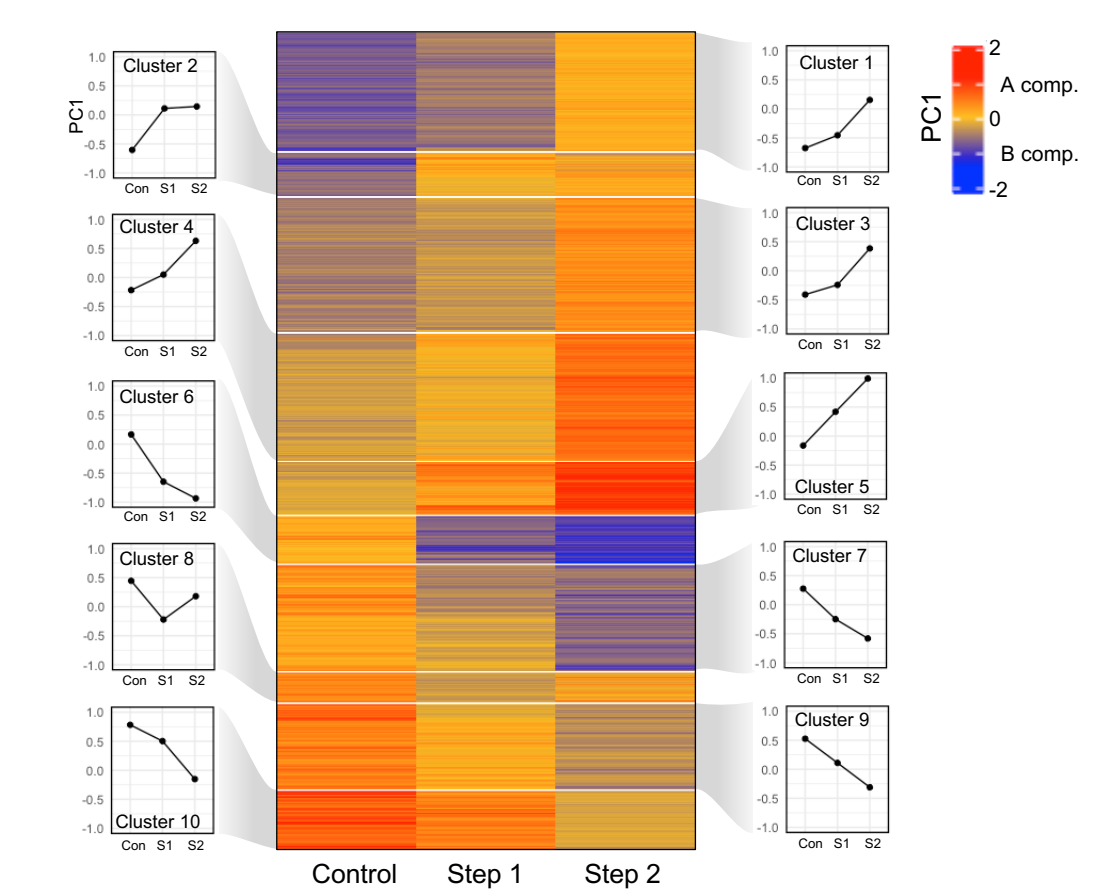

Supplement: NIHMS1939522-supplement-FigS4.pdf [file NIHMS1939522-supplement-FigS4.pdf]

Supplementary Figure 5: DSBs are sufficient to disrupt the 3D genome organization in neurons

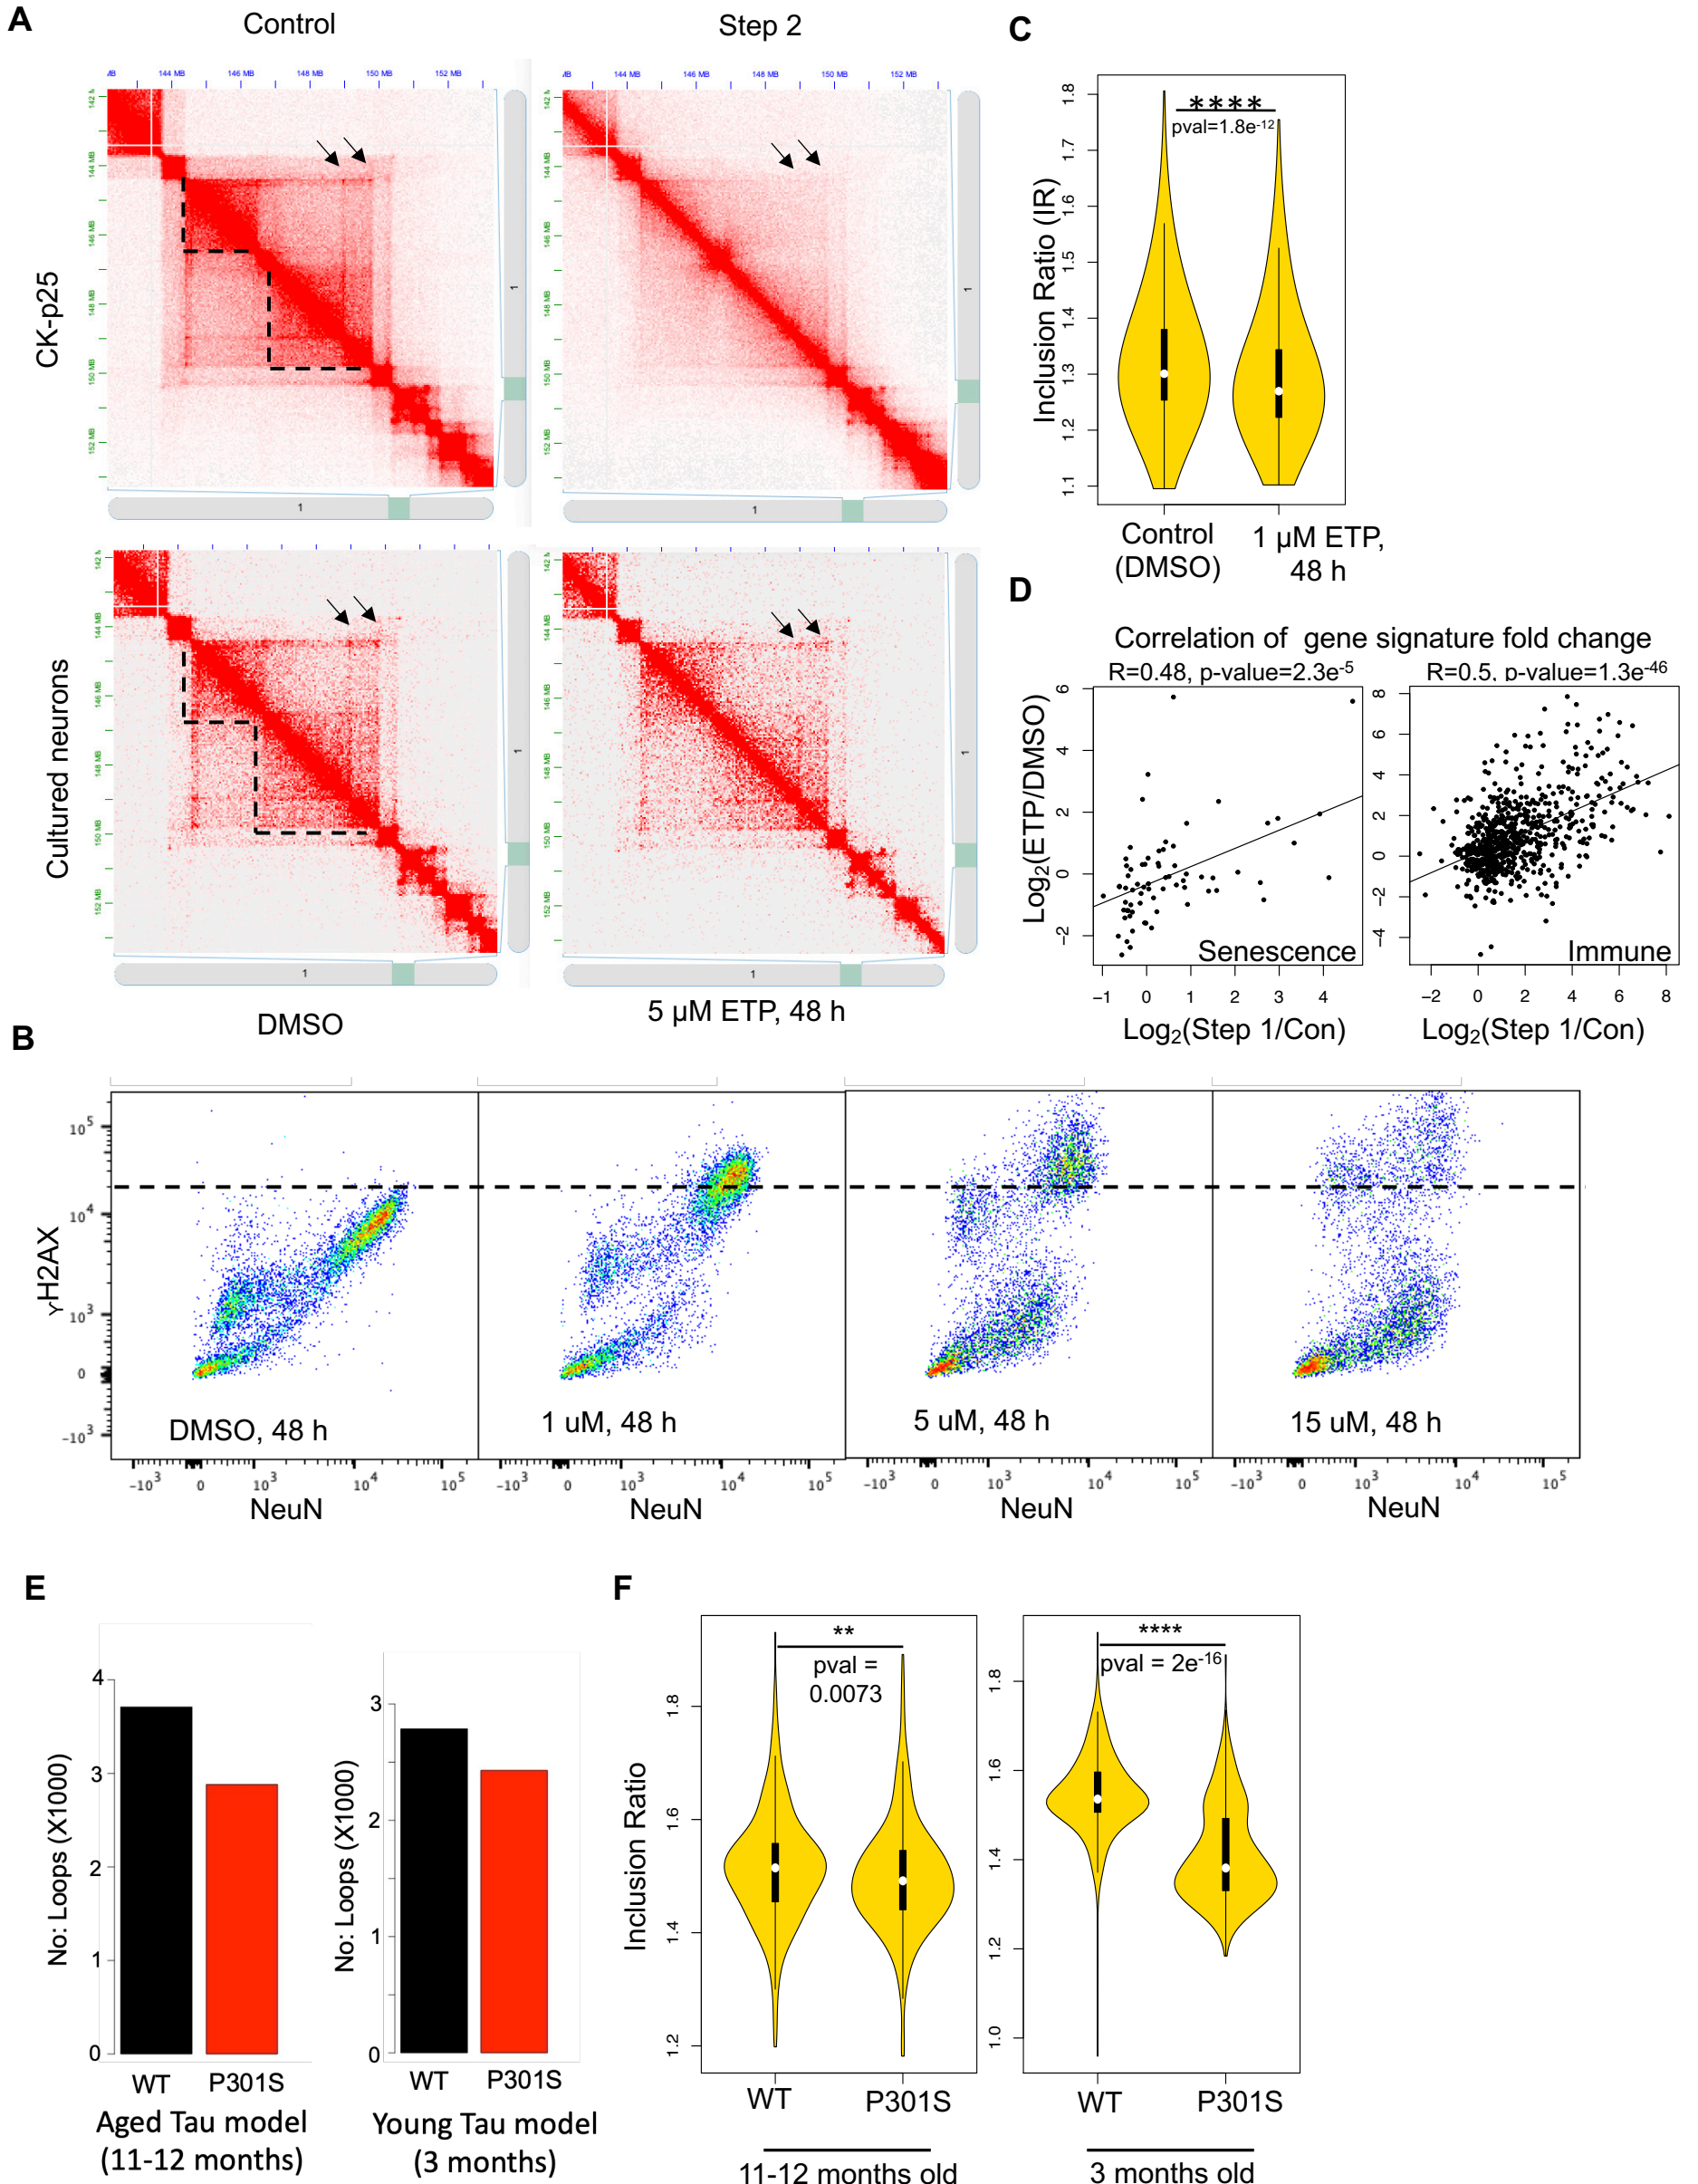

Supplement: NIHMS1939522-supplement-FigS5.pdf [file NIHMS1939522-supplement-FigS5.pdf]

Supplementary Figure 6: Re-organization of the 3D genome aligns with gene expression changes.

**A**

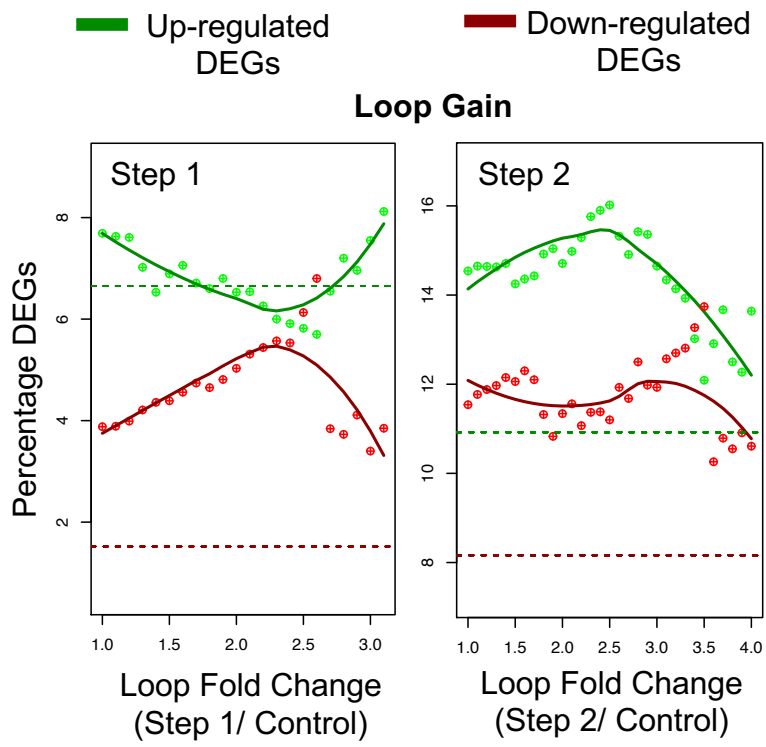

**B**

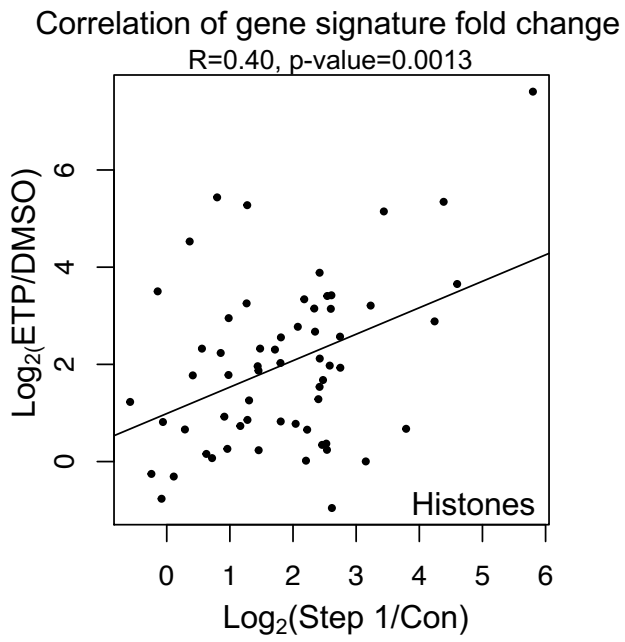

**C**

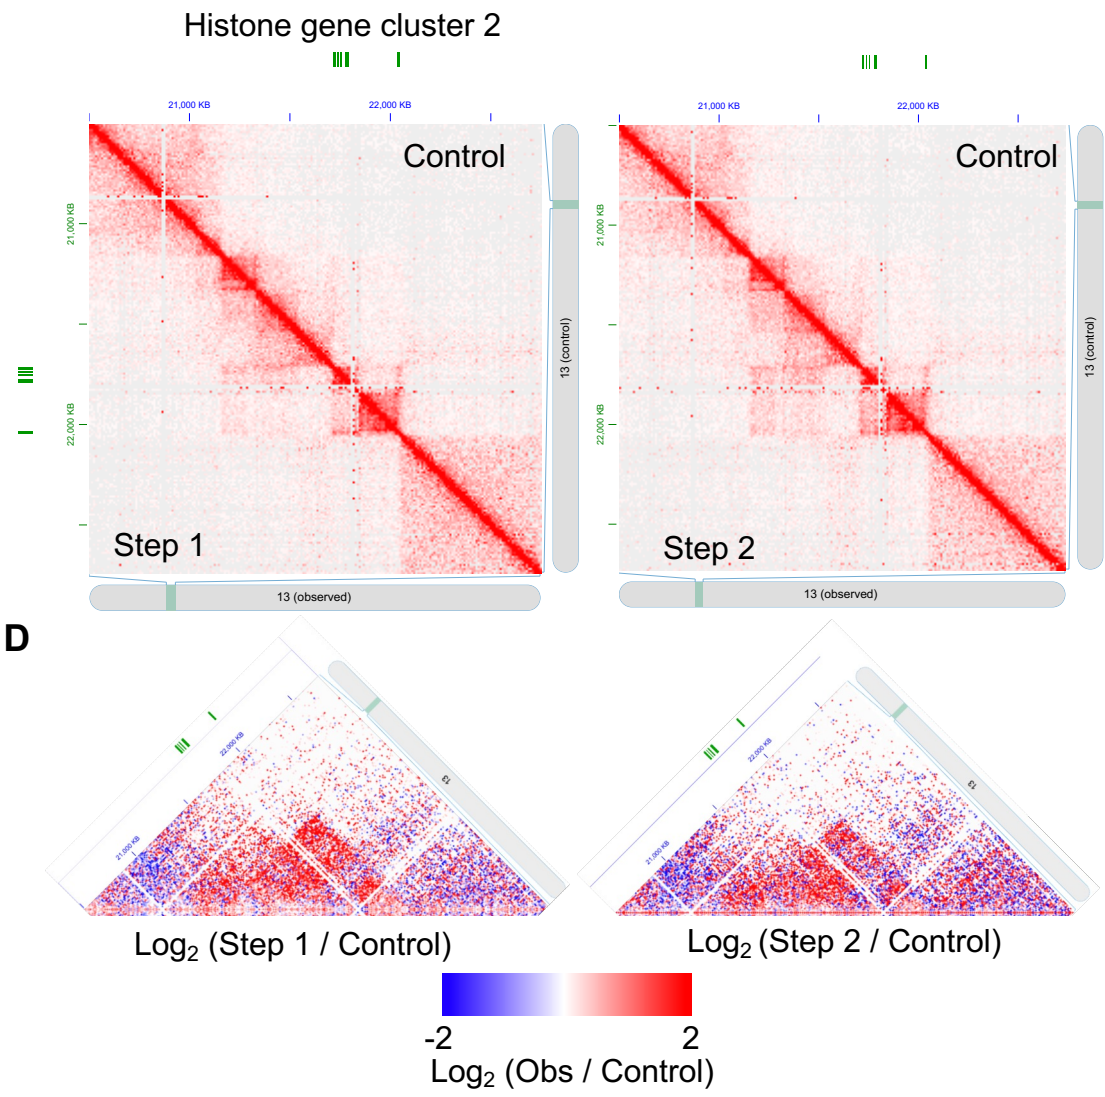

Supplement: NIHMS1939522-supplement-FigS6.pdf [file NIHMS1939522-supplement-FigS6.pdf]
